# Supplementary material for: Synthesis, Optical Characterization in Solution and Solid-State, and DFT Calculations of 3-Acetyl and 3-(1′-(2′-Phenylhydrazono)ethyl)-coumarin-(7)-substituted Derivatives
Source: MDPI journal article supplement (doi:10.3390/molecules27123677), 2022-06-08
Supplement: s1 [file s1]

## Supplementary Information

# Synthesis, optical characterization in solution and solid-state, and DFT calculations of 3-Acetyl-coumarin-(7)-substituted derivatives.

**Cesar A. Villa-Martínez<sup>1</sup>, Nancy E. Magaña-Vergara<sup>2\*</sup>, Mario Rodríguez<sup>3</sup>, Juan P. Mojica-Sánchez<sup>4</sup>, Ángel A. Ramos-Organillo<sup>1</sup>, Joaquín Barroso-Flores<sup>5,6</sup>, I.I. Padilla-Martínez<sup>7</sup> and Francisco J. Martínez-Martínez<sup>1\*</sup>.**

<sup>1</sup> Facultad de Ciencias Químicas, Universidad de Colima, Km 9 Carretera Coquimatlán-Colima, Coquimatlán Colima 28400, México. Email.: cvmartinez@ucol.mx

<sup>2</sup> CONACyT, Facultad de Ciencias Químicas, Universidad de Colima, Km 9 Carretera Coquimatlán-Colima, Coquimatlán Colima 28400, México

<sup>3</sup> Centro de Investigaciones en Óptica A. P. 1-948, 37000, León Gto. México.

<sup>4</sup> Tecnológico Nacional de México, Instituto Tecnológico José Mario Molina Pasquel y Henríquez Campus Tamazula de Gordiano, Carretera Tamazula-Santa Rosa No. 329, 49650 Tamazula de Gordiano, Jalisco, México

<sup>5</sup> Centro Conjunto de Investigación en Química Sustentable UAEM-UNAM, Unidad San Cayetano, Carretera Toluca-Atlacomulco Km.14.5, 50200, Toluca de Lerdo, México.

<sup>6</sup> Instituto de Química, Universidad Nacional Autónoma de México, Circuito Exterior, Ciudad Universitaria, Ciudad de México 04510, México.

<sup>7</sup> Laboratorio de Química Supramolecular y Nanociencias, Instituto Politécnico Nacional-UPIBI, Av. Acueducto s/n Barrio la Laguna Ticomán, Ciudad de México, C.P. 07340, México

Authors to whom correspondence should be addressed; e-mail: fjmartin@eucol.mx; Tel.: +52-312-3161163 and nancymv@ucol.mx.

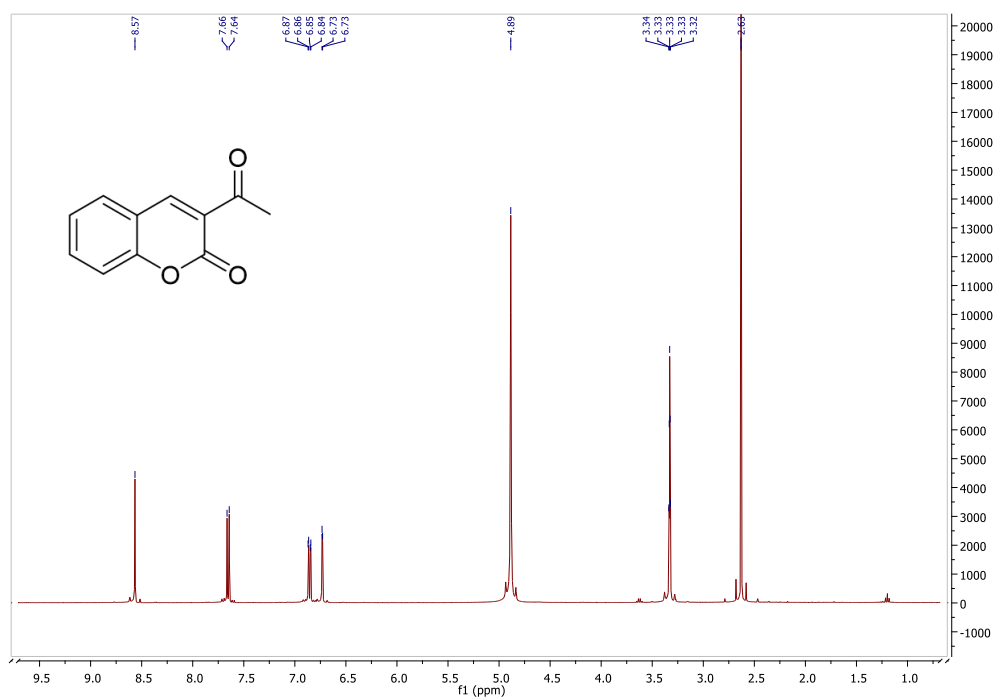

Figure S1.  $^1\text{H-NMR}$  of compound 1a

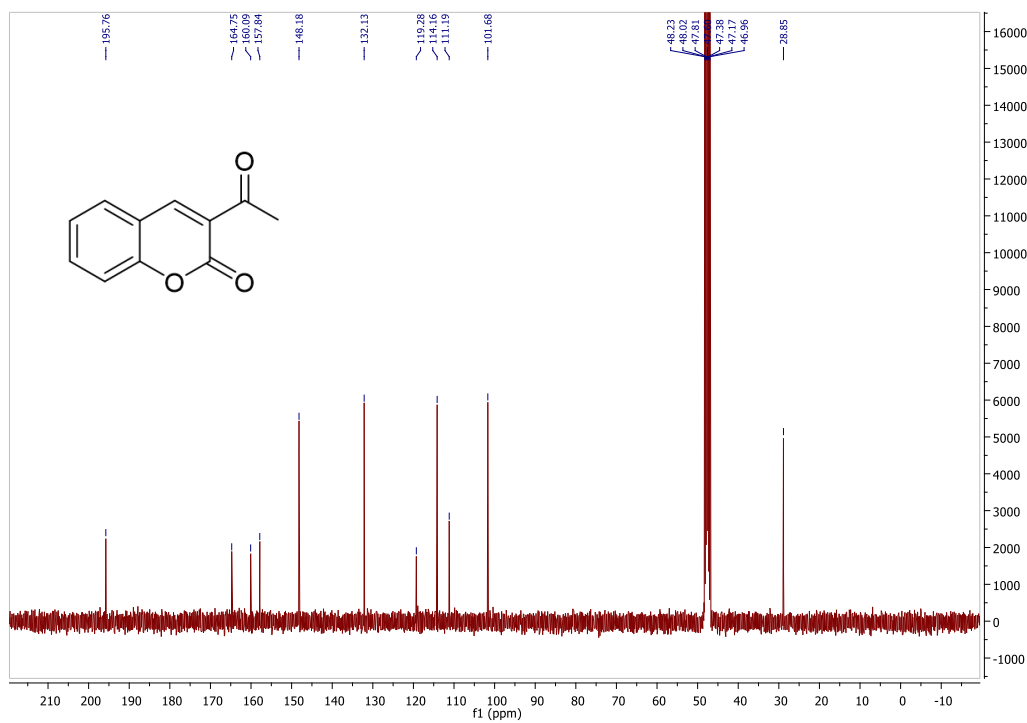

Figure S2.  $^{13}\text{C-NMR}$  of compound 1a

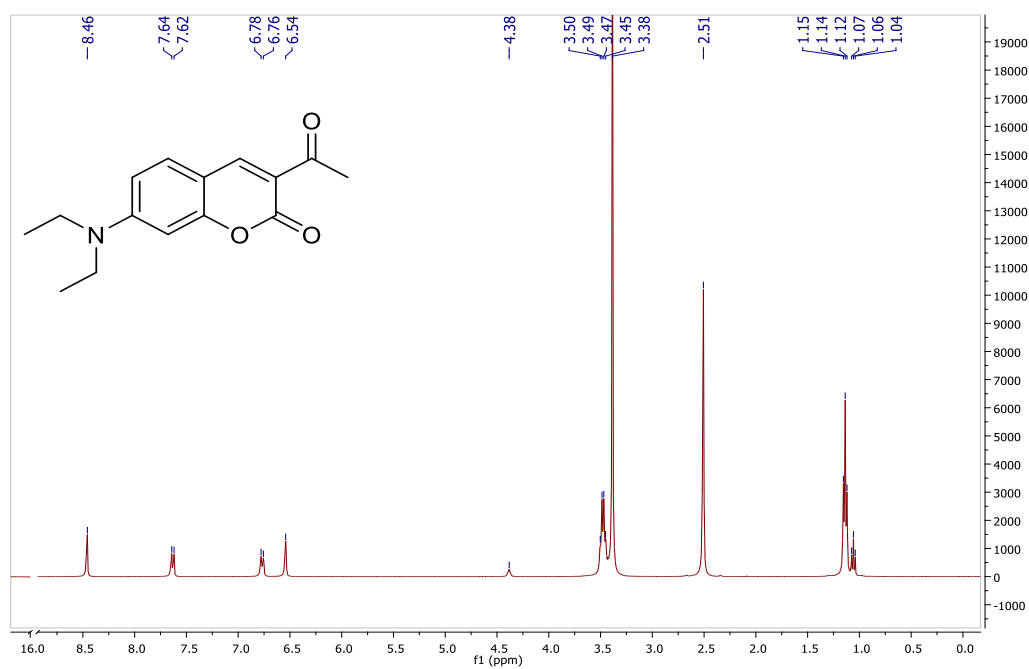

Figure S3. <sup>1</sup>H-NMR of compound 1b

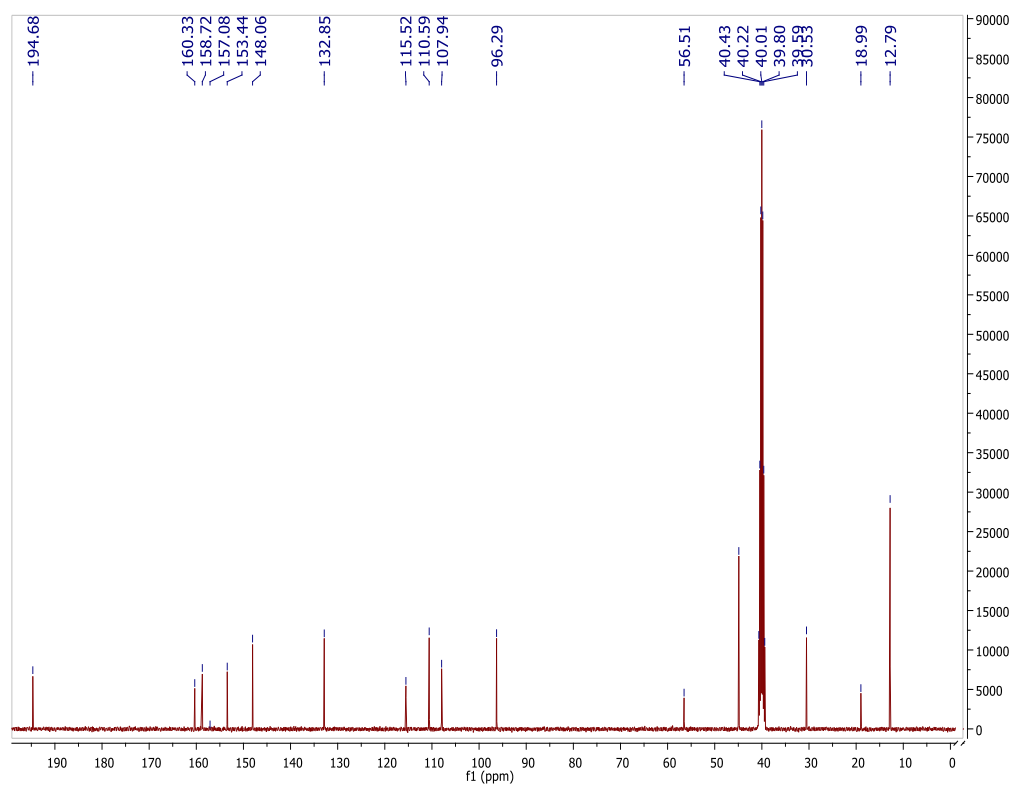

Figure S4. <sup>13</sup>C-NMR of compound 1b

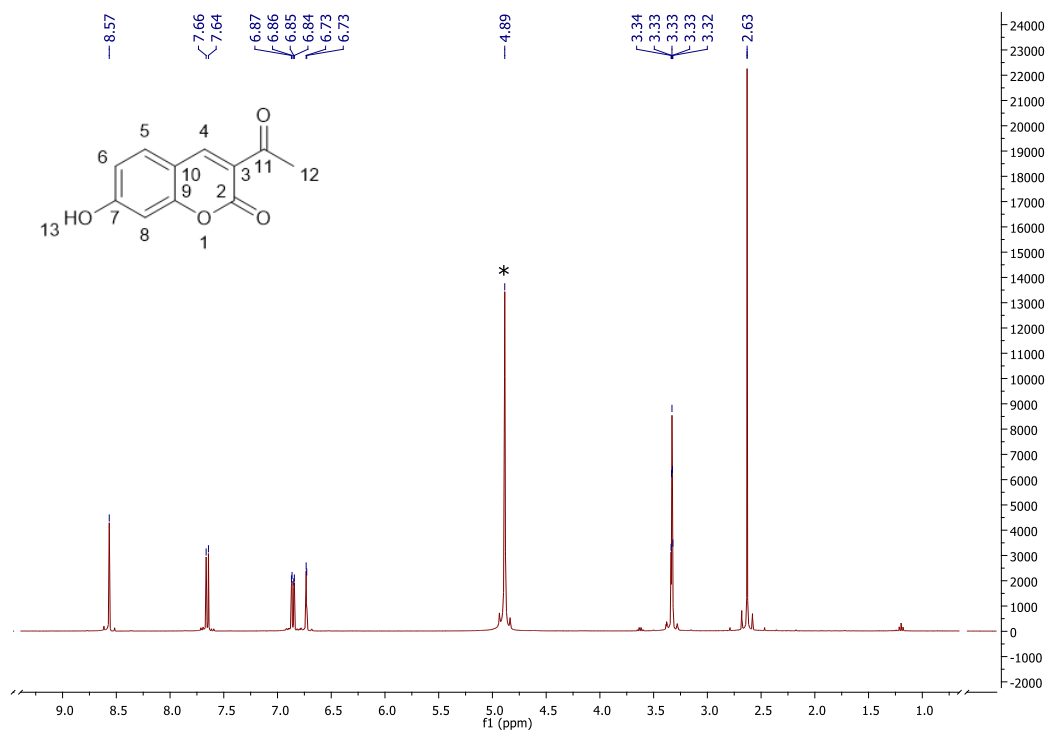

Figure S5.  $^1\text{H-NMR}$  of compound 1c (\*  $\text{H}_2\text{O}$ )

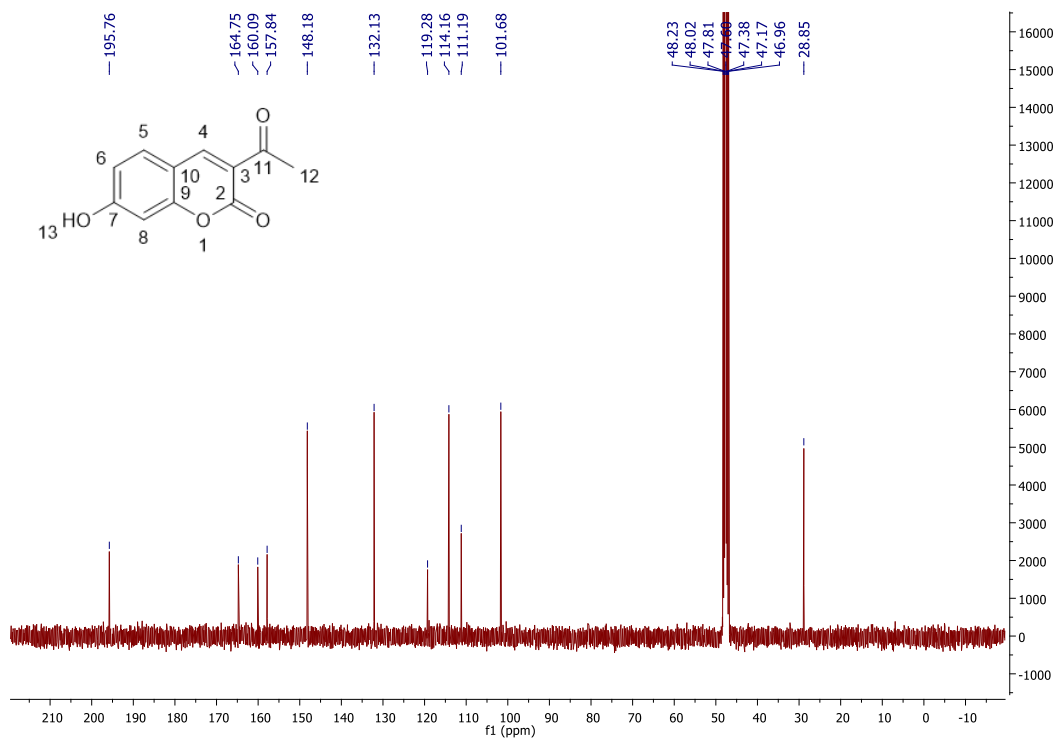

Figure S6.  $^{13}\text{C-NMR}$  of compound 1c

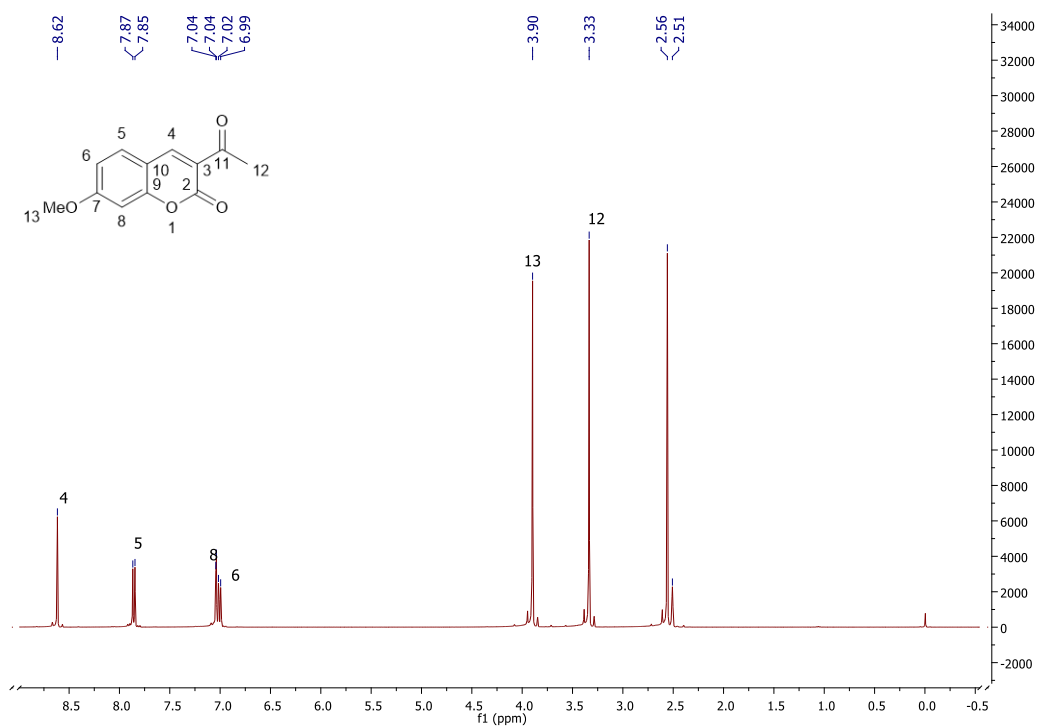

Figure S7.  $^1\text{H-NMR}$  of compound 1d

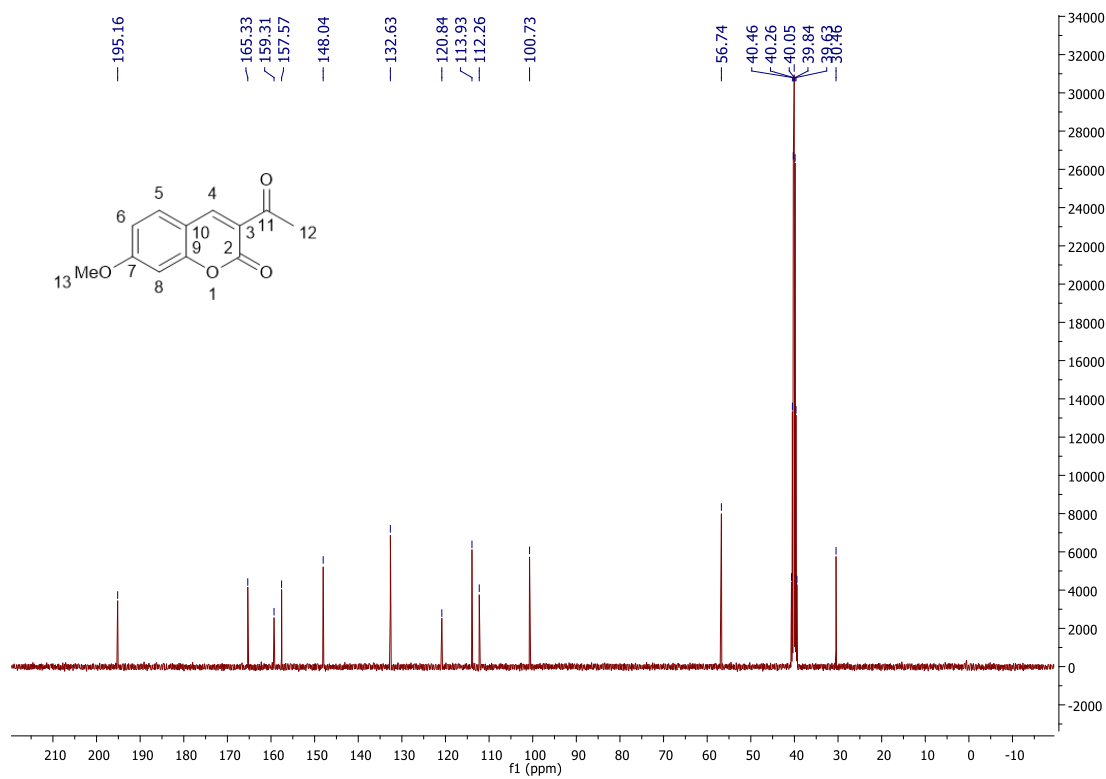

Figure S8.  $^{13}\text{C-NMR}$  of compound 1d

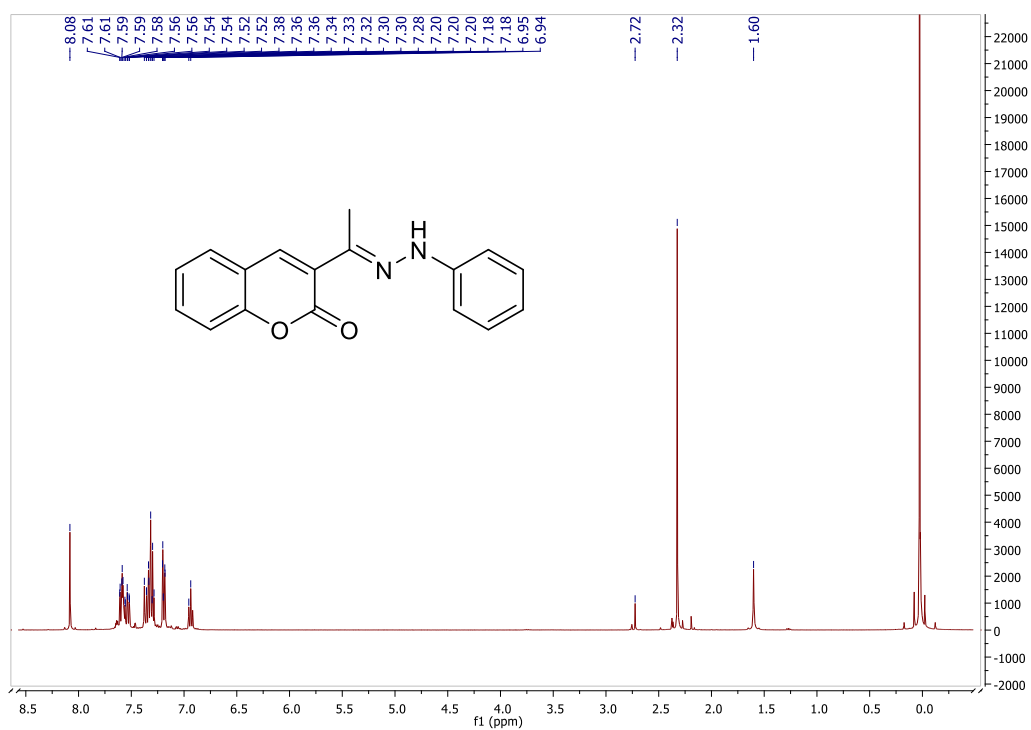

Figure S9. <sup>1</sup>H-NMR of compound 2a

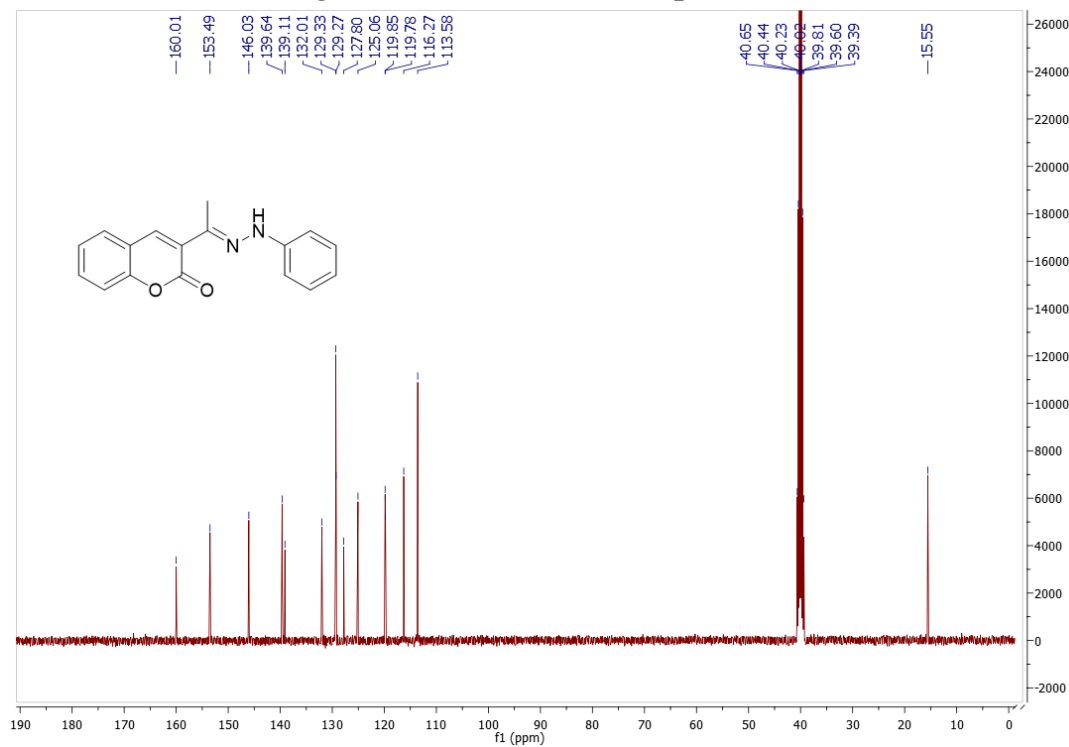

Figure S10. <sup>13</sup>C-NMR of compound 2a

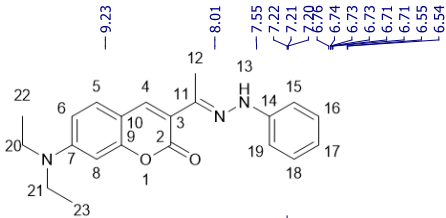

**Figure S11. <sup>1</sup>H-NMR of compound 2b**

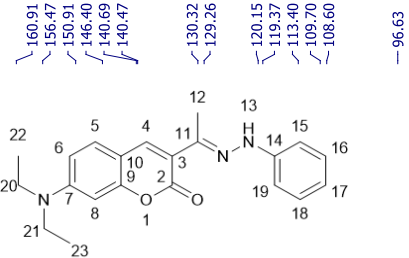

**Figure S12.  $^{13}\text{C}$ -NMR of compound 2b**

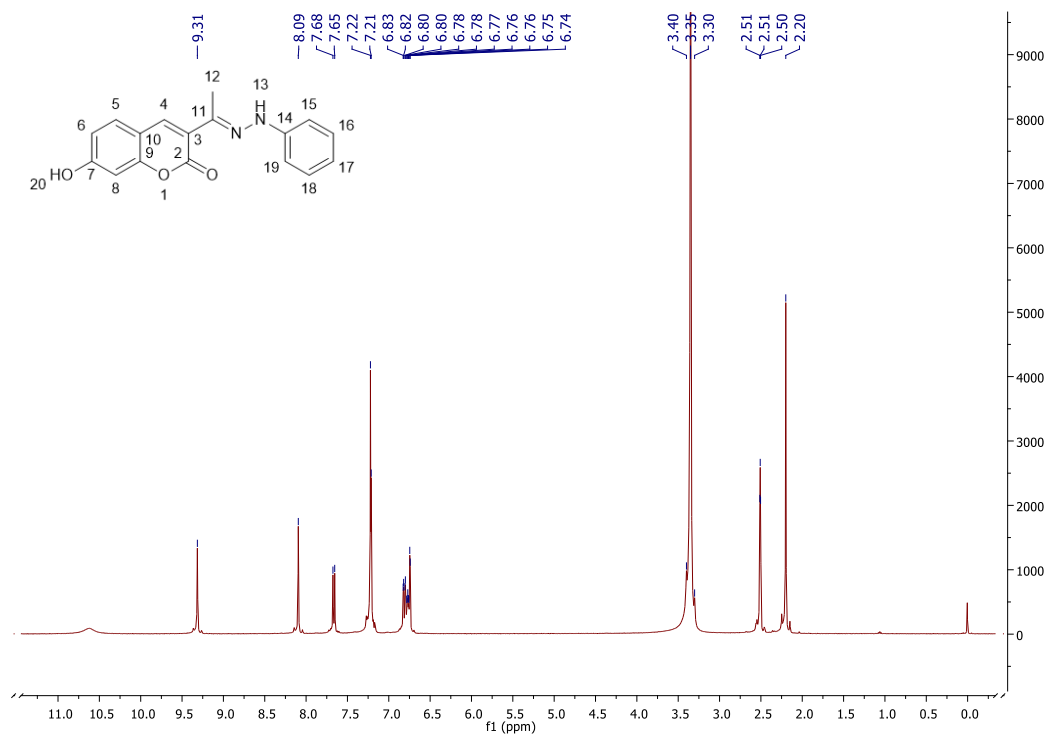

Figure S13.  $^1\text{H-NMR}$  of compound 2c

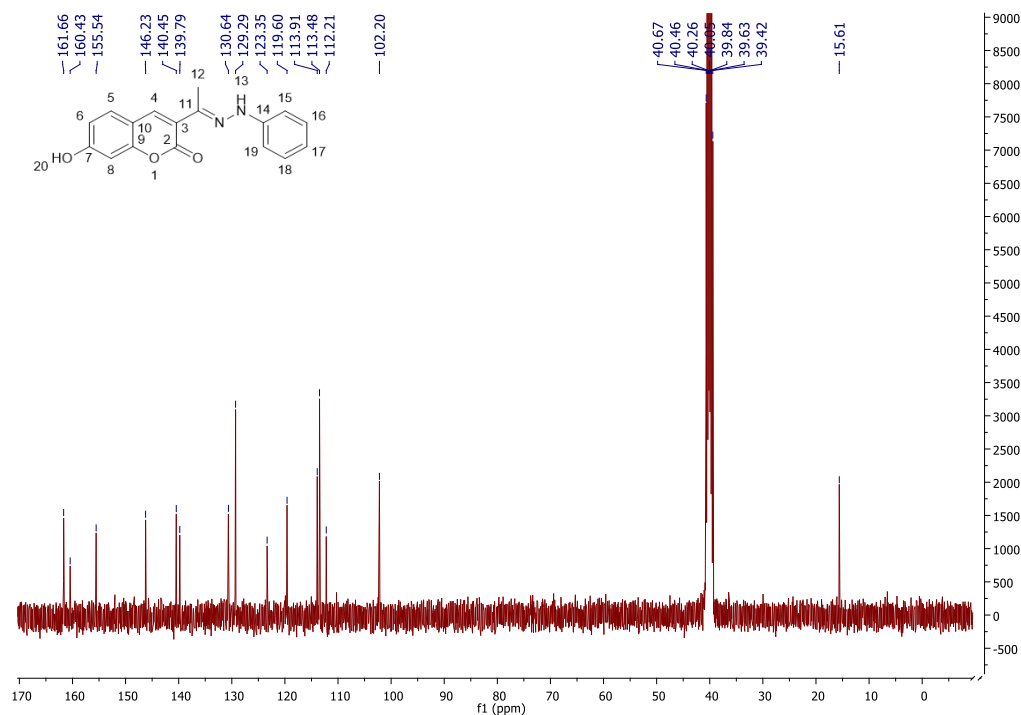

Figure S14.  $^{13}\text{C-NMR}$  of compound 2c



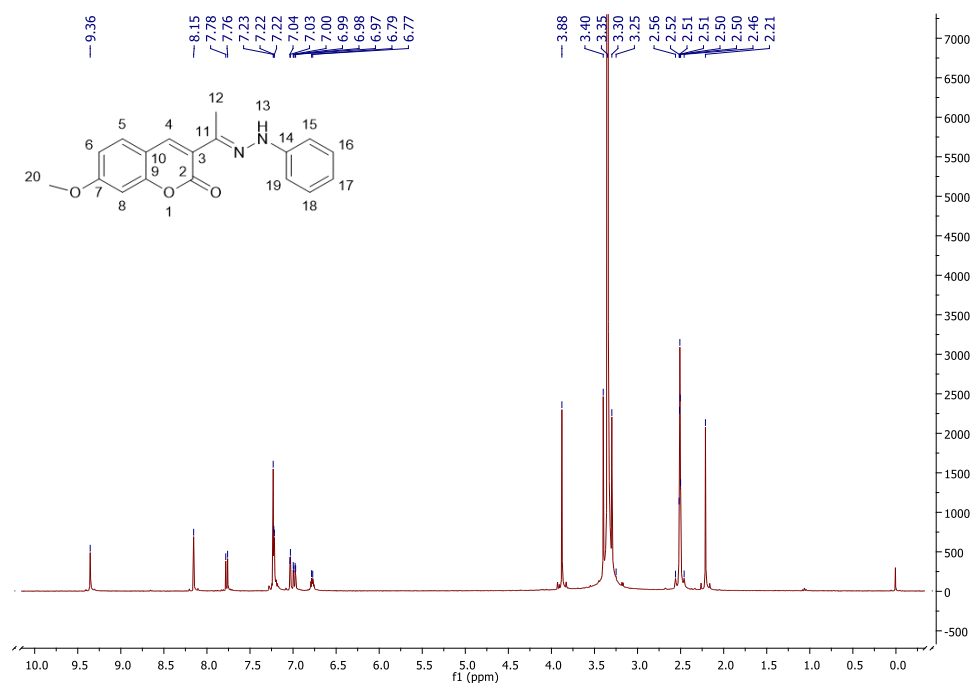

Figure S15.  $^1\text{H}$ -NMR of compound 2d

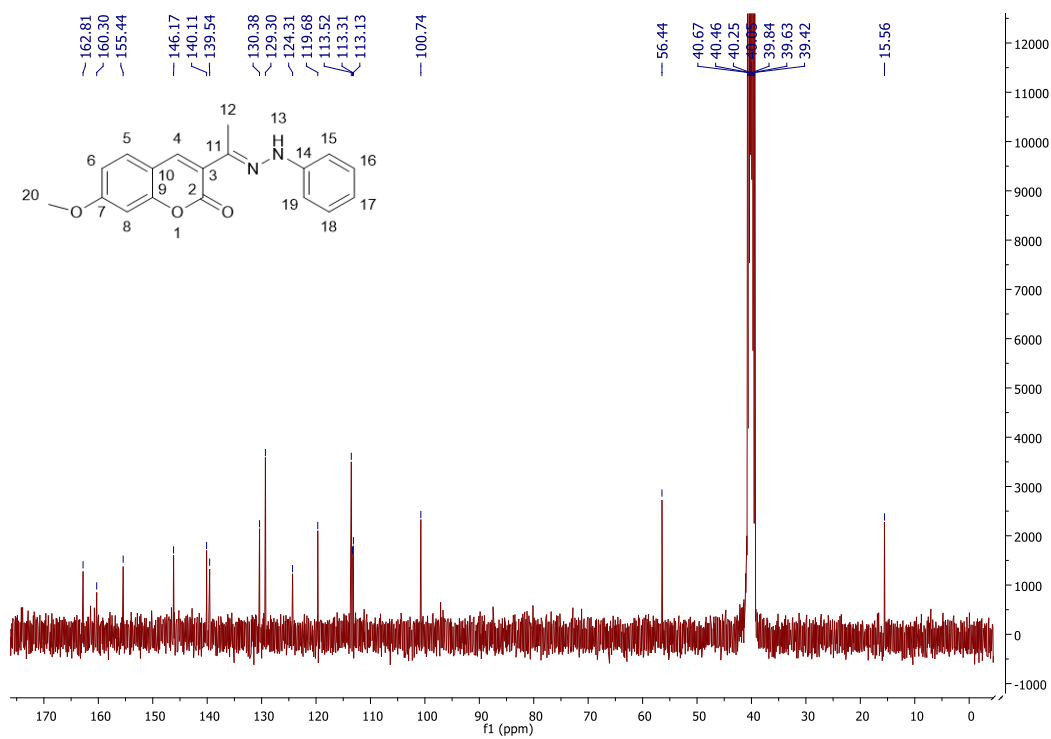

Figure S16.  $^{13}\text{C}$ -NMR of compound 2d

Experimental (exp) and reference (ref) X-ray powder diffraction of compounds  
1a, 1b and 1d

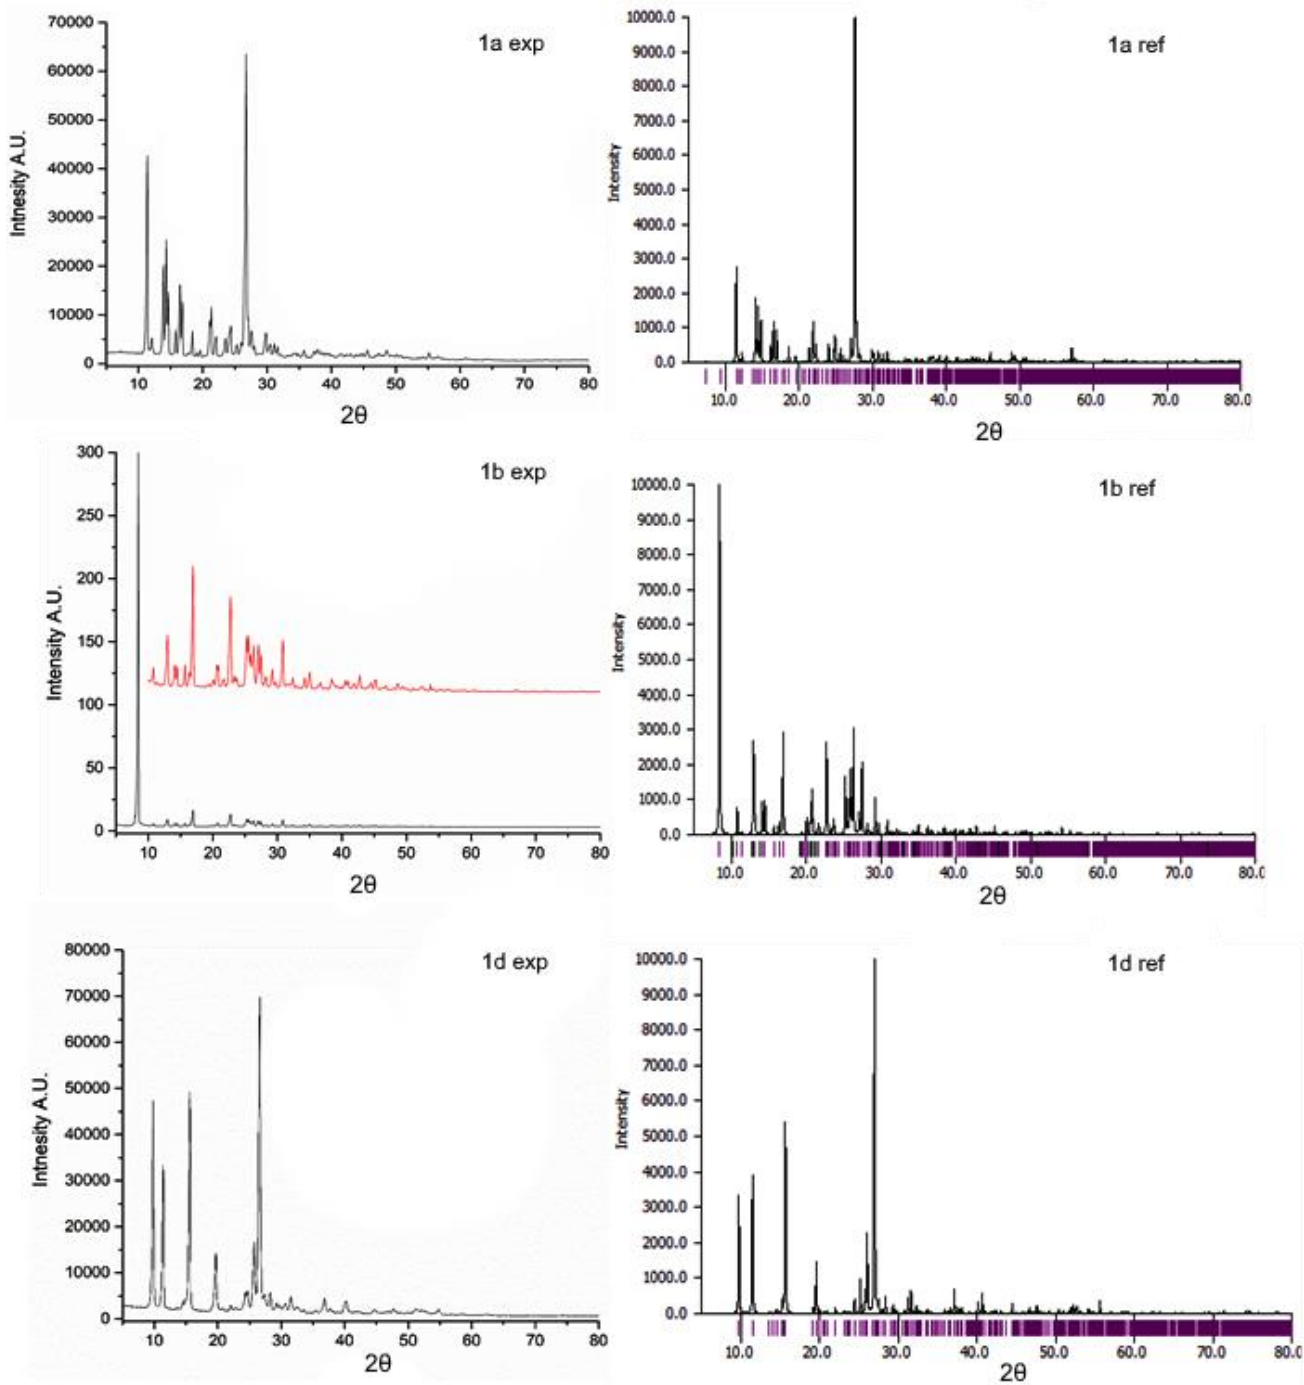

Figure S17.

## Absorption and emission spectra of compounds 1a-d and 2a-d.

### Quantum yield of compounds 1a-d and 2a-d

The quantum yields in solution and solid were obtained by a SC-30 module that has a xenon lamp and integrating sphere (Direct excitation method), which relates the absorbed and emitted photons. For each compound an excitation wavelength was applied to obtain the quantum yield. All measurements were carried out in triplicate. The fluorescence quantum yield ( $\Phi$ ), was determined by the direct excitation method and using following equation (1):

$$\eta_{DEx} = \frac{E_B}{S_A - S_B}$$

$\eta$ = Absolute fluorescence quantum yield

$S_A$ = Peak excitation reference (dissolvent)

$S_B$ = Peak excitation sample

$E_B$ = Peak emission sample

Theoretical calculations.

**Table S1.** TD-DFT parameters determined for the 3-acetyl-2H-chromen-2-one (**1a-d**) compounds. Data are calculated at aug-cc-pVDZ/TD-PBE0(CPCM) level of theory.

| Comp.     | Solvent      | $\lambda_{abs}$<br>(nm) | P.M.O.T | %<br>Contribution<br>to the energy | Gap<br>P.M.O.T<br>(eV) | Absorbance<br>(a.u) | Oscillator<br>strength<br>(f) |
|-----------|--------------|-------------------------|---------|------------------------------------|------------------------|---------------------|-------------------------------|
| <b>1a</b> | THF          | 293.7                   | HOMO-1  | 66.9                               | 4.89                   | 0.15                | 0.42                          |
|           |              |                         | - LUMO  |                                    |                        |                     |                               |
|           |              |                         | HOMO -  | 22.9                               |                        |                     |                               |
|           |              |                         | LUMO    |                                    |                        |                     |                               |
|           | Acetonitrile | 294                     | HOMO-1  | 66.1                               | 4.87                   | 0.15                | 0.44                          |
|           |              |                         | - LUMO  |                                    |                        |                     |                               |
|           |              |                         | HOMO -  | 23.8                               |                        |                     |                               |
|           |              |                         | LUMO    |                                    |                        |                     |                               |
|           | Toluene      | 292.3                   | HOMO -  | 20.5                               | 4.49                   | 0.15                | 0.39                          |
|           |              |                         | LUMO    |                                    |                        |                     |                               |
|           |              |                         | HOMO-2  | 11.8                               |                        |                     |                               |
|           |              |                         | - LUMO  |                                    |                        |                     |                               |
|           |              |                         | HOMO -  | 5.3                                |                        |                     |                               |
|           |              |                         | LUMO+1  |                                    |                        |                     |                               |
| <b>1b</b> | THF          | 409.7                   | HOMO-1  | 1.6                                |                        | 0.11                | 0.64                          |

|    |              |       |             |      |      |      |      |
|----|--------------|-------|-------------|------|------|------|------|
| 1c | Acetonitrile | 410.6 | -           |      |      |      |      |
|    |              |       | LUMO+1      |      |      |      |      |
|    |              |       | HOMO - LUMO | 93.3 | 3.65 |      |      |
|    | Toluene      | 402.4 | -           |      |      |      |      |
|    |              |       | LUMO+1      |      |      |      |      |
|    |              |       | HOMO - LUMO | 93.3 | 3.61 |      |      |
|    | THF          | 321.3 | -           |      |      |      |      |
|    |              |       | LUMO+1      |      |      |      |      |
|    |              |       | HOMO - LUMO | 93.1 | 3.73 |      |      |
|    | Acetonitrile | 321.4 | HOMO-1      | 9.0  |      | 0.14 | 0.54 |
|    |              |       | - LUMO      |      |      |      |      |
|    |              |       | HOMO - LUMO | 84.0 | 4.29 |      |      |
| 1d | Toluene      | 320.7 | -           |      |      |      |      |
|    |              |       | LUMO+1      |      |      |      |      |
|    |              |       | HOMO - LUMO | 93.3 | 3.61 |      |      |
|    | THF          | 327.6 | HOMO-1      | 9.4  |      | 0.14 | 0.55 |
|    |              |       | - LUMO      |      |      |      |      |
|    |              |       | HOMO - LUMO | 83.6 | 4.28 |      |      |
|    | Acetonitrile | 327.8 | -           |      |      |      |      |
|    |              |       | LUMO+1      |      |      |      |      |
|    |              |       | HOMO - LUMO | 93.3 | 3.61 |      |      |
|    | Toluene      | 326.7 | HOMO-2      | 8.5  |      | 0.14 | 0.53 |
|    |              |       | - LUMO      |      |      |      |      |
|    |              |       | HOMO - LUMO | 84.7 | 4.31 |      |      |

P.M.O.T.= Principal Molecular Orbital Transitions

**Table S2.** TD-DFT parameters determined for the 3-(phenylhydrazone)-chromen-2-one (**2a-d**) compounds. Data are calculated at aug-cc-pVDZ/TD-PBE0(CPCM) level of theory.

| Comp. | Solvent | $\lambda_{\text{abs}}$<br>(nm) | P.M.O.T | %<br>Contributi<br>on to the<br>energy | Gap<br>P.M.O.<br>T (eV) | Absorbanc<br>e (a.u) | Oscillato<br>r<br>strength<br>(f) |
|-------|---------|--------------------------------|---------|----------------------------------------|-------------------------|----------------------|-----------------------------------|
|-------|---------|--------------------------------|---------|----------------------------------------|-------------------------|----------------------|-----------------------------------|

|           |              |       |                 |      |      |      |      |
|-----------|--------------|-------|-----------------|------|------|------|------|
| <b>2a</b> | THF          | 538.2 | HOMO – LUMO     | 93.2 | 3.00 | 0.08 | 0.60 |
|           |              | 281.5 | HOMO-3 – LUMO   | 32.4 | 5.06 | 0.16 | 0.18 |
|           |              |       | HOMO – LUMO+2   | 20.1 |      |      |      |
|           | Acetonitrile | 522.5 | HOMO – LUMO     | 93.3 | 3.10 | 0.08 | 0.61 |
|           |              | 292.3 | HOMO-1 – LUMO   | 41.6 | 4.06 | 0.15 | 0.21 |
|           |              |       | HOMO – LUMO+2   | 32.5 |      |      |      |
|           | Toluene      | 562.3 | HOMO – LUMO     | 93.2 | 2.92 | 0.08 | 0.61 |
|           |              | 301.2 | HOMO – LUMO+2   | 30.1 | 4.83 | 0.15 | 0.19 |
|           |              |       | HOMO-1 – LUMO   | 27.9 |      |      |      |
| <b>2b</b> | THF          | 519.5 | HOMO – LUMO     | 93.2 | 3.07 | 0.08 | 0.78 |
|           |              | 349.9 | HOMO-1 – LUMO   | 48.2 | 4.08 | 0.13 | 0.78 |
|           |              |       | HOMO – LUMO+1   | 43.0 |      |      |      |
|           | Acetonitrile | 502.1 | HOMO – LUMO     | 93.1 | 3.10 | 0.09 | 0.82 |
|           |              | 350.8 | HOMO-1 – LUMO   | 55.5 | 4.06 | 0.12 | 0.75 |
|           |              |       | HOMO – LUMO+1   | 35.1 |      |      |      |
|           | Toluene      | 550.6 | HOMO – LUMO     | 93.4 | 2.99 | 0.08 | 0.73 |
|           |              | 350.4 | HOMO – LUMO+1   | 68.1 | 4.29 | 0.13 | 0.74 |
|           |              |       | HOMO-1 – LUMO   | 24.3 |      | 0.13 | 0.74 |
| <b>2c</b> | THF          | 404.4 | HOMO-1 – LUMO+1 | 90.3 | 3.77 | 0.11 | 0.60 |
|           |              | 360.6 | HOMO-2 – LUMO   | 82.0 | 4.26 | 0.12 | 0.50 |
|           | Acetonitrile | 399.7 | HOMO-1 – LUMO+1 | 85.6 | 3.79 | 0.11 | 0.57 |
|           |              | 360.7 | HOMO-2 – LUMO   | 80.8 | 4.21 | 0.12 | 0.54 |
|           | Toluene      | 407.3 | HOMO-1 – LUMO+1 | 84.7 | 3.73 | 0.11 | 0.69 |
|           |              | 356.9 | HOMO-2 – LUMO   | 84.1 | 4.38 | 0.12 | 0.40 |
| <b>2d</b> | THF          | 531.2 | HOMO – LUMO     | 93.3 | 3.07 | 0.08 | 0.61 |
|           |              | 305.5 | HOMO-1          | 69.5 | 4.58 | 0.14 | 0.45 |

|              |       |          |      |      |      |      |
|--------------|-------|----------|------|------|------|------|
| Acetonitrile | 514.4 | - LUMO   |      |      |      |      |
|              |       | HOMO -   | 93.3 | 3.11 | 0.08 | 0.62 |
|              | 305.6 | LUMO     |      |      |      |      |
|              |       | HOMO-1 - | 75.0 | 4.59 | 0.14 | 0.42 |
| Toluene      | 558.6 | LUMO     |      |      |      |      |
|              |       | HOMO -   | 93.2 | 2.99 | 0.08 | 0.60 |
|              | 317.4 | LUMO     |      |      |      |      |
|              |       | HOMO -   | 62.2 | 4.75 | 0.14 | 0.35 |
|              |       | LUMO+2   |      |      |      |      |

---

1. Edinburgh Instruments, FLS980 Series Reference Guide, Integrating sphere for measurements of fluorescence quantum yields and spectra reflectance.
